# Supplementary material for: Practical Application and Methodological Considerations on the Basics of Sports Nutrition in Basketball: A Comprehensive Systematic Review of Observational and Interventional Studies
Source: MDPI journal article supplement (doi:10.3390/nu15204484), 2023-10-23
Supplement: s1 [file s1]

**Supplementary material S4.** Risk of bias evaluation (A) and share of reasons for risk of biases (B) for randomized parallel group and cross-over interventional studies investigating dietary interventions related to hydration/dehydration

| References            | Study design              | Randomisation process | Bias arising from period and carryover effects | Deviations from the intended interventions | Missing outcome data | Measurement of the outcome | Selection of the reported result | Overall |
|-----------------------|---------------------------|-----------------------|------------------------------------------------|--------------------------------------------|----------------------|----------------------------|----------------------------------|---------|
| Baker et al. 2007a    | randomized cross-over     | !                     | +                                              | -                                          | +                    | !                          | -                                | -       |
| Baker et al. 2007b    | randomized cross-over     | !                     | +                                              | -                                          | +                    | !                          | -                                | -       |
| Carvalho et al. 2011  | randomized cross-over     | !                     | +                                              | +                                          | +                    | !                          | !                                | !       |
| Dougherty et al. 2011 | randomized cross-over     | +                     | +                                              | -                                          | +                    | !                          | -                                | -       |
| Hoffman et al. 1995   | randomized cross-over     | !                     | +                                              | -                                          | +                    | !                          | !                                | -       |
| Hoffman et al. 2012   | randomized cross-over     | +                     | !                                              | !                                          | +                    | !                          | -                                | -       |
| Louis et al. 2018     | randomized cross-over     | !                     | !                                              | -                                          | +                    | !                          | !                                | -       |
| Minehan et al. 2002   | randomized cross-over     | !                     | +                                              | -                                          | +                    | !                          | !                                | -       |
| Taim et al. 2021      | randomized parallel group | !                     | not applicable                                 | !                                          | +                    | !                          | !                                | !       |

Legend:

+ Low risk
 ! Some concerns
 - High risk

**(A)**

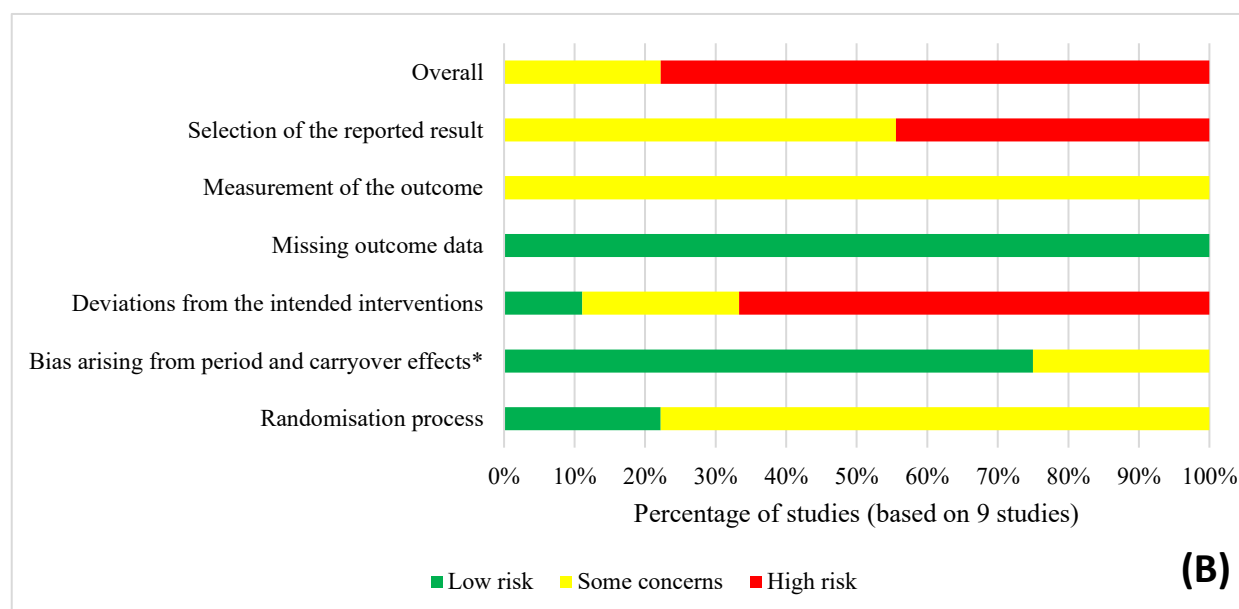

**(B)**

\* applicable for cross-over designs
