# Supplementary material for: Practical Application and Methodological Considerations on the Basics of Sports Nutrition in Basketball: A Comprehensive Systematic Review of Observational and Interventional Studies
Source: MDPI journal article supplement (doi:10.3390/nu15204484), 2023-10-23
Supplement: s1 [file s1]

Supplementary table S2. Basic characteristics of studies included in the systematic review

| No.                          | Authors                      | Location  | Study design           | Sample size | Gender                                              | Age (years)                                | Level of training                                                                                                                                                 |
|------------------------------|------------------------------|-----------|------------------------|-------------|-----------------------------------------------------|--------------------------------------------|-------------------------------------------------------------------------------------------------------------------------------------------------------------------|
| <b>Observational studies</b> |                              |           |                        |             |                                                     |                                            |                                                                                                                                                                   |
| 1.                           | Arnaoutis et al. 2015        | -         | cross-sectional        | 12          | males                                               | 15.5 ± 0.5                                 | athletes competing in national and international championships                                                                                                    |
| 2.                           | Baranauskas et al. 2013      | Lithuania | cross-sectional        | 52          | males ( <i>n</i> = 39)<br>females ( <i>n</i> = 13)  | 18.6 ± 1.8<br>16.1 ± 0.5                   | Lithuanian Olympic Team                                                                                                                                           |
| 3.                           | Baranauskas et al. 2020      | Lithuania | cross-sectional        | 14          | females                                             | 26.4 ± 4.5                                 | high-performance <b>deaf</b> women's players                                                                                                                      |
| 4.                           | Barnes et al. 2019           | -         | retrospective analysis | 196         | males<br>females                                    | 23 ± 5                                     | -                                                                                                                                                                 |
| 5.                           | Branderburg and Gaetz 2012   | Canada    | cross-sectional        | 17          | females                                             | 24.2 ± 3                                   | national team                                                                                                                                                     |
| 6.                           | Broad et al. 1996            | Australia | cross-sectional        | 31          | males ( <i>n</i> = 19)<br>females ( <i>n</i> = 12)  | 16 – 18                                    | players training at Australian Institute of Sport                                                                                                                 |
| 7.                           | Boumosleh et al. 2021        | Lebanon   | cross-sectional        | 178         | males ( <i>n</i> = 126)<br>females ( <i>n</i> = 52) | 28.17 ± 4.42<br>25.13 ± 4.28               | 1 <sup>st</sup> Division Lebanese Championship                                                                                                                    |
| 8.                           | Davis et al. 2021            | USA       | cross-sectional        | 119         | males                                               | 23.8 ± 2.0                                 | players in the National Basketball Association minor league                                                                                                       |
| 9.                           | del Mar Bibiloni et al. 2018 | Spain     | cross-sectional        | 183         | males ( <i>n</i> = 96)<br>females ( <i>n</i> = 87)  | 21.7 (20.4 ± 25.3)*<br>22.4 (20.1 ± 24.6)* | amateur players                                                                                                                                                   |
| 10.                          | Dzimbova 2020                | Bulgaria  | cross-sectional        | 16          | males, females                                      | 15.4 ± 1.2                                 | -                                                                                                                                                                 |
| 11.                          | Escribano-Ott et al. 2022    | Spain     | cross-sectional        | 104         | males ( <i>n</i> = 49)<br>females ( <i>n</i> = 55)  | 15 – 18                                    | children involved in sport professionally under 18 years ( <i>n</i> = 69), professional adult players ( <i>n</i> = 21), non-professional players ( <i>n</i> = 14) |

| No. | Authors                            | Location | Study design                        | Sample size | Gender                  | Age (years)                                                        | Level of training                                                                                           |
|-----|------------------------------------|----------|-------------------------------------|-------------|-------------------------|--------------------------------------------------------------------|-------------------------------------------------------------------------------------------------------------|
| 12. | Eskici and Ersoy 2016              | Turkey   | cross-sectional                     | 22          | females                 | 25.5 ± 7.2                                                         | national <b>wheelchair</b> team                                                                             |
| 13. | Ferro et al. 2017                  | Spain    | cross-sectional                     | 11          | males                   | 30 ± 6                                                             | national <b>wheelchair</b> team                                                                             |
| 14. | Gacek and Wojtowicz 2021           | Poland   | cross-sectional                     | 165         | males                   | 23.44 ± 3.74                                                       | professionally training basketball (1 <sup>st</sup> and 2 <sup>nd</sup> leagues, as well as the top league) |
| 15. | Gacek 2022                         | Poland   | cross-sectional                     | 48          | males                   | 26.6 ± 4.5                                                         | professional players                                                                                        |
| 16. | Gorrell et al. 2021                | USA      | cross-sectional                     | 16          | males                   | 18 – 26                                                            | 10 top-ranked National Collegiate Athletic Association (NCAA) schools in USA                                |
| 17. | Heishman et al. 2021               | USA      | retrospective longitudinal analysis | 15          | males                   | 20.4 ± 1.7                                                         | NCAA Division I                                                                                             |
| 18. | Hickson et al. 1986                | USA      | cross-sectional                     | 13          | females                 | 19.4 ± 0.3                                                         | intercollegiate team                                                                                        |
| 19. | Hickson et al. 1990                | USA      | cross-sectional                     | 12          | males                   | 16.4 ± 0.7                                                         | high-school varsity players                                                                                 |
| 20. | Kampouri et al. 2019               | Greece   | cross-sectional                     | 53          | females                 | 24.30 ± 6.4                                                        | elite players                                                                                               |
| 21. | Kostopoulos et al. 2017            | Greece   | cross-sectional                     | 18          | -                       | 24 ± 4                                                             | A1 division (1 <sup>st</sup> and 2 <sup>nd</sup> division)                                                  |
| 22. | Leinus and Ööpik 1998              | Estonia  | cross-sectional                     | 14          | males ( <i>n</i> = 7)   | 21.1 ± 2.6                                                         | 4-6 y of training, 90 min/day, 5-6 times/week                                                               |
|     |                                    |          |                                     |             | females ( <i>n</i> = 7) | 20.6 ± 1.9                                                         | 8-10 y of training, 90 min/day, 2-4 times/week                                                              |
| 23. | Logan-Sprenger and McNaughton 2020 | Canada   | cross-sectional                     | 11          | females                 | 18 – 41                                                            | national wheelchair team                                                                                    |
| 24. | Mavra et al. 2014                  | Croatia  | cross-sectional                     | 153         | females                 | 21.90 ± 4.89 (1 <sup>st</sup> )<br>17.30 ± 2.85 (2 <sup>nd</sup> ) | Players from the 1 <sup>st</sup> ( <i>n</i> = 79) and the 2 <sup>nd</sup> ( <i>n</i> = 74) national league  |

| No. | Authors                    | Location | Study design                      | Sample size | Gender                                             | Age (years)                | Level of training                                                  |
|-----|----------------------------|----------|-----------------------------------|-------------|----------------------------------------------------|----------------------------|--------------------------------------------------------------------|
| 25. | Michou and Costarelli 2011 | Greece   | cross-sectional                   | 74          | females                                            | 24.92 ± 3.81               | national and international level                                   |
| 26. | Monthuy-Blanc et al. 2012  | France   | cross-sectional                   | 41          | females                                            | 13.59 ± 1.32               | non-elite players                                                  |
| 27. | Musaiger and Ragheb 1994   | Bahrain  | cross-sectional                   | 39          | -                                                  | -                          | 1 <sup>st</sup> class clubs                                        |
| 28. | Nepocatyč et al. 2017      | USA      | cross-sectional                   | 10          | females                                            | 18 – 22                    | NCAA Division I                                                    |
| 29. | Nikić et al. 2014          | Serbia   | cross-sectional                   | 57          | males                                              | 15.6 ± 0.9                 | elite junior                                                       |
| 30. | Nowak et al. 1988          | USA      | cross-sectional                   | 26          | males ( <i>n</i> = 16)<br>females ( <i>n</i> = 10) | 18.9 ± 1.29<br>19.4 ± 0.97 | National Association of<br>Intercollegiate Athletics – Division II |
| 31. | Osterberg et al. 2009      | USA      | cross-sectional                   | 29          | males                                              | -                          | National Basketball Association                                    |
| 32. | Papandreou et al. 2007     | Greece   | cross-sectional                   | 21          | males ( <i>n</i> = 8)<br>females ( <i>n</i> = 13)  | 20 ± 4<br>25 ± 5           | professional players                                               |
| 33. | Quintas et al. 2003        | Spain    | cross-sectional                   | 26          | females                                            | 17.2 ± 2.1                 | -                                                                  |
| 34. | Sánchez-Díaz et al. 2021   | Spain    | cross-sectional                   | 23          | males ( <i>n</i> = 13)<br>females ( <i>n</i> = 10) | 13.5 ± 0.3<br>12.7 ± 0.5   | highest competitive level for the U-14 category                    |
| 35. | Schröder et al. 2004       | Spain    | cross-sectional                   | 50          | males                                              | 25.1 ± 4.0                 | 1 <sup>st</sup> Spanish Basketball League                          |
| 36. | Shimizu et al. 2019        | Japan    | cross-sectional data              | 13          | females                                            | 28.9 ± 8.1                 | national wheelchair team                                           |
| 37. | Silva et al. 2012          | Portugal | longitudinal approach (~34 weeks) | 9           | males ( <i>n</i> = 7)<br>females ( <i>n</i> = 2)   | 16.0 ± 0.5<br>16.3 ± 0.5   | junior national team                                               |
| 38. | Silva et al. 2013          | Portugal | cross-sectional                   | 19          | males ( <i>n</i> = 12)<br>females ( <i>n</i> = 7)  | 17.0 ± 0.7<br>16.9 ± 0.7   | junior national team                                               |
| 39. | Silva et al. 2017          | -        | 8 months observation              | 24          | -                                                  | -                          | -                                                                  |

| No.                         | Authors                         | Location       | Study design                                                                                              | Sample size | Gender                                     | Age (years)              | Level of training                                                                                |
|-----------------------------|---------------------------------|----------------|-----------------------------------------------------------------------------------------------------------|-------------|--------------------------------------------|--------------------------|--------------------------------------------------------------------------------------------------|
| 40.                         | Szczepańska and Spałkowska 2012 | Poland         | cross-sectional                                                                                           | 107         | males ( $n = 89$ )<br>females ( $n = 18$ ) | 17 – 33                  | -                                                                                                |
| 41.                         | Thigpen et al. 2014             | USA            | cross-sectional                                                                                           | 22          | males ( $n = 11$ )<br>females ( $n = 11$ ) | 21 $\pm$ 1<br>19 $\pm$ 1 | NCAA Division II                                                                                 |
| 42.                         | Toti et al. 2021                | Italy          | cross-sectional                                                                                           | 15          | males                                      | 28.5 $\pm$ 1.5           | national wheelchair team                                                                         |
| 43.                         | Vukasinović-Vesić et al. 2015   | International  | cross-sectional                                                                                           | 96          | males                                      | 19 $\pm$ 0.79            | elite players during official International Basketball Federation (FIBA) Europe U20 Championship |
| 44.                         | Wells et al. 2015               | USA            | cross-sectional                                                                                           | 8           | females                                    | -                        | varsity players from Campbell University team                                                    |
| 45.                         | Zanders et al. 2021             | USA            | cross-sectional                                                                                           | 13          | females                                    | 19.8 $\pm$ 1.3           | NCAA Division II                                                                                 |
| <b>Experimental studies</b> |                                 |                |                                                                                                           |             |                                            |                          |                                                                                                  |
| 46.                         | Abbasi et al. 2021              | USA            | controlled laboratory study/dietary counseling intervention                                               | 10          | females                                    | -                        | NCAA Division II                                                                                 |
| 47.                         | Afman et al. 2014               | United Kingdom | randomized, counterbalanced crossover placebo-controlled study                                            | 10          | males                                      | 20 $\pm$ 1               | from university to international level competition                                               |
| 48.                         | Baker et al. 2007a              | USA            | six arms randomized cross-over placebo controlled trial (double blind with respect to euhydration trials) | 11          | males                                      | 21 $\pm$ 3               | -                                                                                                |

| No. | Authors                 | Location    | Study design                                                                                             | Sample size | Gender  | Age (years)               | Level of training                                                                                                                |
|-----|-------------------------|-------------|----------------------------------------------------------------------------------------------------------|-------------|---------|---------------------------|----------------------------------------------------------------------------------------------------------------------------------|
| 49. | Baker et al. 2007b      | USA         | six-arm randomized cross-over placebo controlled trial (double blind with respect to euhydration trials) | 17          | males   | 21.1 ± 2.4                | highly skilled players ranged from high school ( <i>n</i> = 9) to college (Division III, <i>n</i> = 4; Division I, <i>n</i> = 4) |
| 50. | Baranauskas et al. 2011 | Lithuania   | single arm interventional study                                                                          | 10          | females | 16.2 ± 0.4                | Lithuanian Olympic Sport Centre players                                                                                          |
| 51. | Carvalho et al. 2011    | Portugal    | three-arm randomized cross-over trial                                                                    | 12          | males   | 14.8 ± 0.45               | U-15 national team                                                                                                               |
| 52. | Čabarkapa et al. 2020   | USA         | two-arm cross-over design                                                                                | 18          | males   | 27.5 ± 10.6               | considerable amount of playing experience                                                                                        |
| 53. | Daniel et al. 2019      | Brazil      | two-arm randomized cross-over design                                                                     | 9           | males   | 18.0 ± 0.7                | high-performance                                                                                                                 |
| 54. | Dougherty et al. 2006   | USA         | double blind randomized placebo-controlled cross-over trial                                              | 15          | males   | 13.5 ± 1.3                | first-team member of either their school or district Amateur Athletic Union team or both in the central Pennsylvania region      |
| 55. | Gentle et al. 2014      | New Zealand | two-arm randomized cross-over design                                                                     | 10          | males   | 22 ± 2                    | well-trained                                                                                                                     |
| 56. | Ghiasvand et al. 2010   | Iran        | randomized double blind placebo-controlled clinical trial                                                | 34          | males   | 24 (17 – 35) <sup>‡</sup> | well-trained                                                                                                                     |

| No. | Authors                | Location  | Study design                                                             | Sample size | Gender                                   | Age (years)  | Level of training                                           |
|-----|------------------------|-----------|--------------------------------------------------------------------------|-------------|------------------------------------------|--------------|-------------------------------------------------------------|
| 57. | Grams et al. 2016      | Spain     | interventional study (dietary counseling)                                | 17          | males                                    | 30 (21 – 40) | national wheelchair team                                    |
| 58. | Ho et al. 2018         | Taiwan    | two-arm randomized, placebo-controlled counterbalanced cross-over design | 15          | -                                        | 18 – 20      | Division I collegiate players                               |
| 59. | Hoffman et al. 1995    | Israel    | two-arm balanced cross-over design                                       | 10          | males                                    | 17.3 ± 0.9   | players in regional youth team                              |
| 60. | Hoffman et al. 2012    | USA       | four-arm double blind cross-over design                                  | 10          | females                                  | 21.2 ± 1.6   | NCAA Division I                                             |
| 61. | Louis et al. 2018      | -         | two-arm randomized cross-over trial                                      | 9           | males                                    | 16.2 ± 0.7   | U-18 of the basketball academy of the National team         |
| 62. | Marques et al. 2015    | Brazil    | single arm study                                                         | 8           | males                                    | 33.8 ± 8.3   | wheelchair athletes participating in national championships |
| 63. | Minehan et al. 2002    | Australia | three-arms randomized cross-over design                                  | 15          | males ( $n = 8$ )<br>females ( $n = 7$ ) | -            | players training at Australian Institute of Sport           |
| 64. | Michalczyk et al. 2018 | Poland    | single-arm dietary intervention                                          | 11          | males                                    | 24.27 ± 2.6  | 1 <sup>st</sup> Division of the Polish Basketball League    |
| 65. | Michalczyk et al. 2019 | Poland    | single-arm dietary intervention                                          | 15          | males                                    | 23.5 ± 2.2   | 1 <sup>st</sup> Division of the Polish Basketball League    |
| 66. | Ronghui 2015           | China     | two-arm randomized parallel                                              | 10          | -                                        | -            | university professional players                             |

| No. | Authors             | Location  | Study design                                                            | Sample size | Gender                                                                      | Age (years)                                              | Level of training        |
|-----|---------------------|-----------|-------------------------------------------------------------------------|-------------|-----------------------------------------------------------------------------|----------------------------------------------------------|--------------------------|
| 67. | Shi 2005            | China     | group placebo-controlled study<br>two-arm parallel-group study          | 10          | males                                                                       | 19 – 23                                                  | CUBA athletes            |
| 68. | Taim et al. 2021    | Singapore | parallel group randomized between-subject design                        | 18          | males                                                                       | 23.4 ± 1.4 (experimental)<br>22.8 ± 1.2 (control)        | national varsity league  |
| 69. | Taylor et al. 2016  | USA       | two-arm randomized placebo-controlled double blind parallel group study | 14          | females                                                                     | 20 ± 2 (experimental)<br>21 ± 3 (control)                | NCAA Division III        |
| 70. | Toti et al. 2021    | Italy     | interventional study (dietary counseling)                               | 37          | males ( <i>n</i> = 16)<br>males ( <i>n</i> = 12)<br>females ( <i>n</i> = 9) | 27 (24 – 31)<br>19 (18 – 21)<br>26 (19 – 30)             | national wheelchair team |
| 71. | Tsoufi et al. 2017  | Greece    | interventional study (dietary counseling)                               | 15          | males                                                                       | -                                                        | elite players            |
| 72. | Wilborn et al. 2013 | USA       | Two-arm randomized double blind parallel group study                    | 16          | females                                                                     | 20.0 ± 1.9 (whey protein)<br>21.0 ± 2.8 (casein protein) | NCAA Division III        |

Abbreviations: NCAA, National Collegiate Athletic Association. Note: \* values are median (interquartile range); † values are median (range)
