# Supplementary material for: Practical Application and Methodological Considerations on the Basics of Sports Nutrition in Basketball: A Comprehensive Systematic Review of Observational and Interventional Studies
Source: MDPI journal article supplement (doi:10.3390/nu15204484), 2023-10-23
Supplement: s1 [file s1]

**Supplementary material S3.** Risk of bias evaluation for observational cross-sectional studies related to habitual energy value and macronutrients intake (A-B) and habitual hydration strategies and hydration status (C-D)

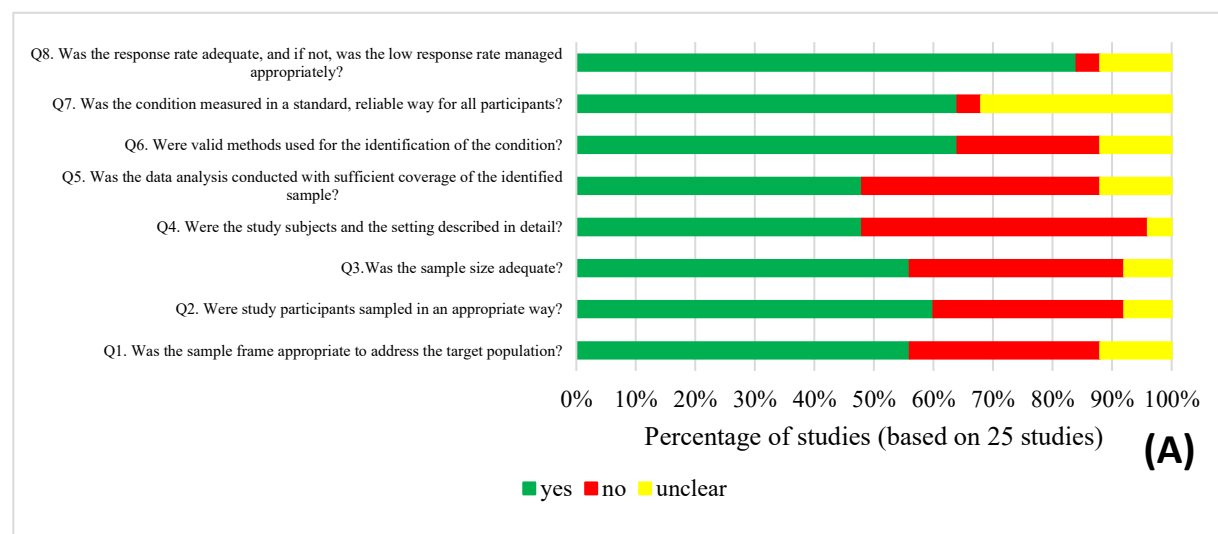

| References              | Questions |         |         |         |         |         |         |         |
|-------------------------|-----------|---------|---------|---------|---------|---------|---------|---------|
|                         | Q1        | Q2      | Q3      | Q4      | Q5      | Q6      | Q7      | Q8      |
| Baranauskas et al. 2011 | no        | no      | no      | no      | no      | no      | unclear | yes     |
| Baranauskas et al. 2013 | yes       | yes     | yes     | yes     | no      | no      | unclear | yes     |
| Baranauskas et al. 2020 | yes       | yes     | yes     | yes     | yes     | yes     | yes     | yes     |
| Dzimbova 2020           | no        | no      | no      | no      | no      | yes     | yes     | yes     |
| Eskici & Ersoy 2016     | yes       | yes     | yes     | no      | yes     | no      | unclear | yes     |
| Ferro et al. 2017       | yes       | yes     | yes     | yes     | yes     | yes     | yes     | yes     |
| Gacek 2022              | yes       | yes     | yes     | yes     | yes     | no      | yes     | yes     |
| Grams et al. 2016       | yes       | yes     | yes     | no      | yes     | yes     | yes     | yes     |
| Hickson et al. 1986     | no        | no      | no      | no      | no      | yes     | yes     | yes     |
| Hickson et al. 1990     | no        | no      | no      | no      | no      | yes     | yes     | yes     |
| Kostopoulos et al. 2017 | unclear   | yes     | unclear | yes     | no      | yes     | yes     | yes     |
| Leinus & Ööpik 1998     | no        | no      | no      | no      | no      | yes     | yes     | yes     |
| Nepocatych et al. 2017  | no        | unclear | no      | no      | no      | yes     | yes     | unclear |
| Nikić et al. 2014       | yes       | yes     | yes     | no      | unclear | yes     | yes     | yes     |
| Nowak et al. 1988       | no        | no      | no      | no      | no      | yes     | yes     | yes     |
| Papandreou et al. 2007  | no        | no      | no      | no      | yes     | unclear | unclear | yes     |
| Quintas et al. 2003     | unclear   | unclear | unclear | yes     | unclear | no      | no      | yes     |
| Schröder et al. 2004    | yes       | yes     | yes     | yes     | unclear | no      | unclear | no      |
| Shimizu et al. 2019     | yes       | yes     | yes     | yes     | yes     | yes     | yes     | yes     |
| Silva et al. 2012       | yes       | yes     | yes     | yes     | yes     | unclear | unclear | yes     |
| Silva et al. 2013       | yes       | yes     | yes     | yes     | yes     | yes     | yes     | yes     |
| Silva et al. 2017       | yes       | yes     | yes     | unclear | yes     | yes     | yes     | yes     |
| Toti et al. 2021        | yes       | yes     | yes     | yes     | yes     | yes     | unclear | unclear |
| Toti et al. 2022        | yes       | yes     | yes     | yes     | yes     | yes     | yes     | yes     |
| Zanders et al. 2021     | unclear   | no      | no      | yes     | no      | unclear | unclear | unclear |

Legend: yes (green), no (red), unclear (yellow)

(B)

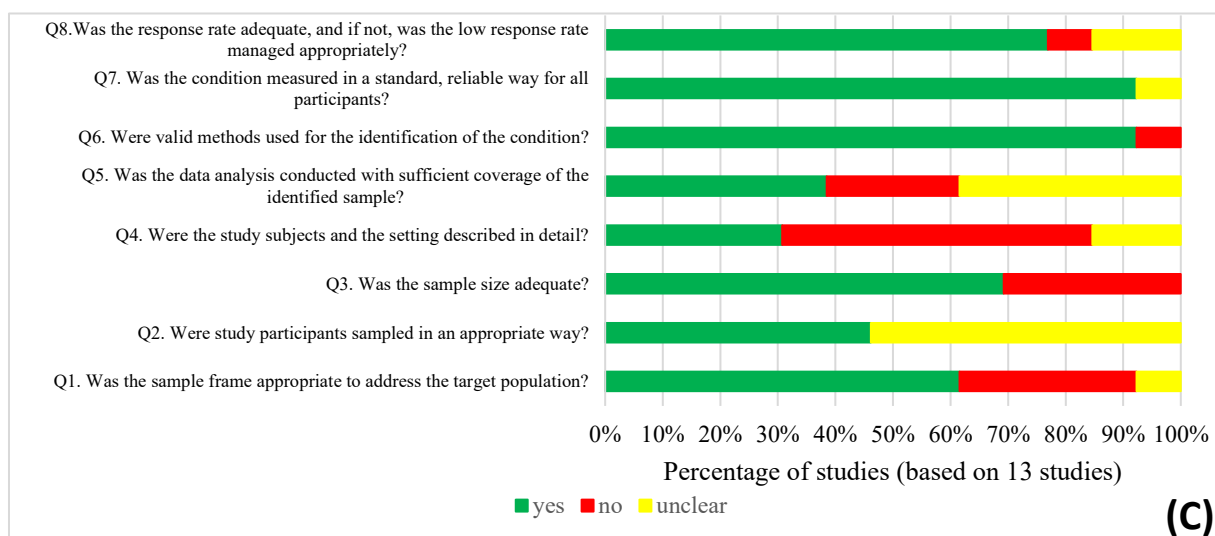

| References                       | Questions |         |     |         |         |     |         |         |
|----------------------------------|-----------|---------|-----|---------|---------|-----|---------|---------|
|                                  | Q1        | Q2      | Q3  | Q4      | Q5      | Q6  | Q7      | Q8      |
| Abassi et al. 2021               | no        | unclear | no  | yes     | unclear | yes | yes     | yes     |
| Arnaoutis et al. 2015            | no        | unclear | no  | no      | unclear | yes | yes     | yes     |
| Baker et al. 2007b               | unclear   | unclear | yes | yes     | no      | yes | yes     | yes     |
| Barnes et al. 2019               | yes       | yes     | yes | no      | no      | yes | yes     | yes     |
| Brandenburg & Gaetz 2012         | no        | unclear | no  | no      | unclear | yes | yes     | yes     |
| Broad et al. 1996                | yes       | yes     | yes | no      | yes     | yes | yes     | yes     |
| Heishman et al. 2021             | yes       | unclear | yes | no      | yes     | yes | yes     | unclear |
| Logan-Sprenger & McNaughton 2019 | yes       | yes     | yes | unclear | yes     | yes | yes     | yes     |
| Osterberg et al. 2009            | yes       | yes     | yes | unclear | unclear | yes | yes     | unclear |
| Schröder et al. 2004             | yes       | yes     | yes | yes     | unclear | no  | unclear | no      |
| Taim et al. 2021                 | yes       | unclear | no  | no      | no      | yes | yes     | yes     |
| Thigpen et al. 2014              | yes       | unclear | yes | no      | yes     | yes | yes     | yes     |
| Vukašinović-Vesić et al. 2015    | yes       | yes     | yes | yes     | yes     | yes | yes     | yes     |

Legend

■ yes ■ no ■ unclear

(D)
