# Supplementary material for: Practical Application and Methodological Considerations on the Basics of Sports Nutrition in Basketball: A Comprehensive Systematic Review of Observational and Interventional Studies
Source: MDPI journal article supplement (doi:10.3390/nu15204484), 2023-10-23
Supplement: s1 [file s1]

**Supplementary material S5.** Risk of bias evaluation (A-B) for randomized parallel group and cross-over interventional studies and risk of bias evaluation for single-arm interventional (C-D) investigating dietary interventions related to manipulation in CHO/PRO/FAT intake

| References            | Study design              | Randomisation process | Period and carryover effects | Deviations from the intended interventions | Missing outcome data | Measurement of the outcome | Selection of the reported result | Overall |
|-----------------------|---------------------------|-----------------------|------------------------------|--------------------------------------------|----------------------|----------------------------|----------------------------------|---------|
| Afman et al. 2014     | randomized cross-over     | !                     | +                            | !                                          | +                    | !                          | !                                | !       |
| Daniel et al. 2019    | randomized cross-over     | !                     | !                            | !                                          | +                    | !                          | !                                | !       |
| Gentle et al. 2014    | randomized cross-over     | !                     | !                            | -                                          | +                    | !                          | !                                | -       |
| Ghiasvand et al. 2014 | randomized parallel group | !                     | not applicable               | -                                          | +                    | !                          | !                                | -       |
| Ho et al. 2018        | randomized cross-over     | !                     | +                            | -                                          | +                    | !                          | !                                | -       |
| Ronghui 2015          | randomized parallel group | !                     | not applicable               | -                                          | +                    | !                          | !                                | -       |
| Shi 2005              | randomized parallel group | !                     | not applicable               | -                                          | +                    | !                          | -                                | -       |
| Taylor et al. 2016    | randomized parallel group | !                     | not applicable               | +                                          | +                    | !                          | !                                | !       |
| Wilborn et al. 2013   | randomized parallel group | !                     | not applicable               | !                                          | +                    | !                          | !                                | !       |

Legend:

+ Low risk
 ! Some concerns
 - High risk

**(A)**

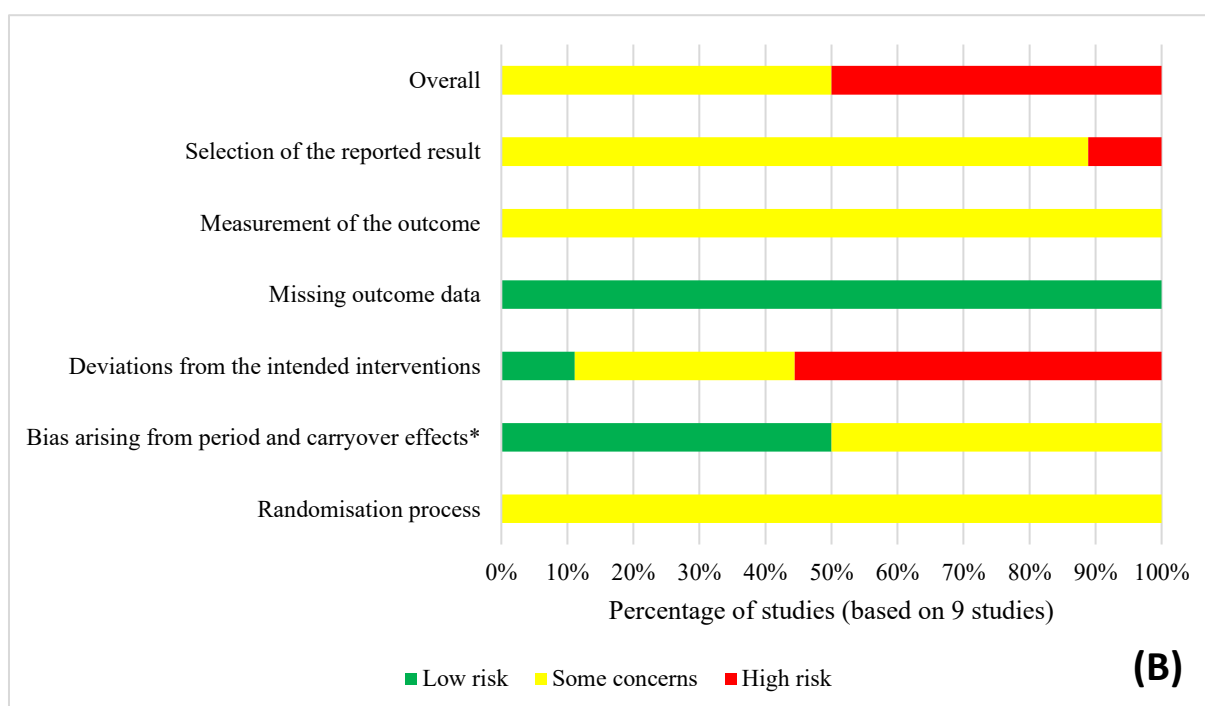

**(B)**

\* applicable for cross-over designs

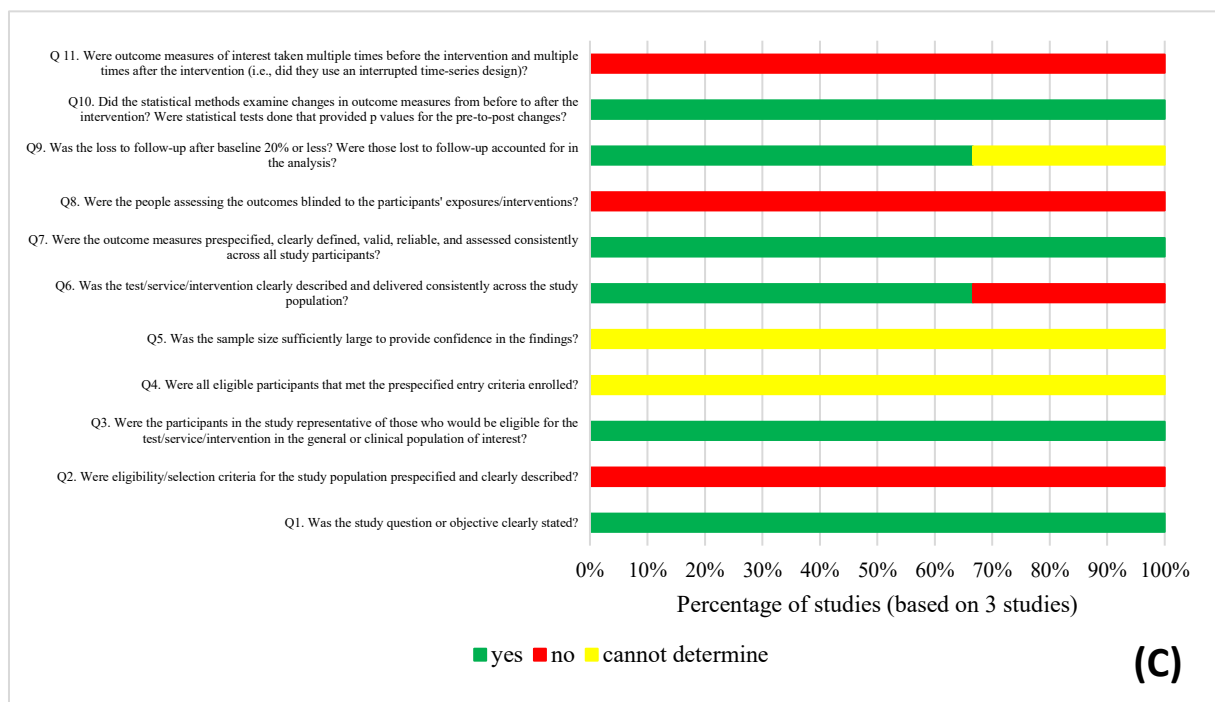

| References             | Questions |    |     |                  |                  |     |     |    |                  |     |     |
|------------------------|-----------|----|-----|------------------|------------------|-----|-----|----|------------------|-----|-----|
|                        | Q1        | Q2 | Q3  | Q4               | Q5               | Q6  | Q7  | Q8 | Q9               | Q10 | Q11 |
| Marques et al. 2015    | yes       | no | yes | cannot determine | cannot determine | no  | yes | no | yes              | yes | no  |
| Michalczyk et al. 2018 | yes       | no | yes | cannot determine | cannot determine | yes | yes | no | cannot determine | yes | no  |
| Michalczyk et al. 2019 | yes       | no | yes | cannot determine | cannot determine | yes | yes | no | yes              | yes | no  |

Legend

|     |    |                  |
|-----|----|------------------|
| yes | no | cannot determine |
|-----|----|------------------|

**(D)**
