# Supplementary material for: Practical Application and Methodological Considerations on the Basics of Sports Nutrition in Basketball: A Comprehensive Systematic Review of Observational and Interventional Studies
Source: MDPI journal article supplement (doi:10.3390/nu15204484), 2023-10-23
Supplement: s1 [file s1]

**Supplementary material S6.** Risk of bias evaluation for observational cross-sectional (A-B), single-arm interventional (C-D) and randomized cross-over interventional (E) studies related to eating behaviours/nutritional knowledge

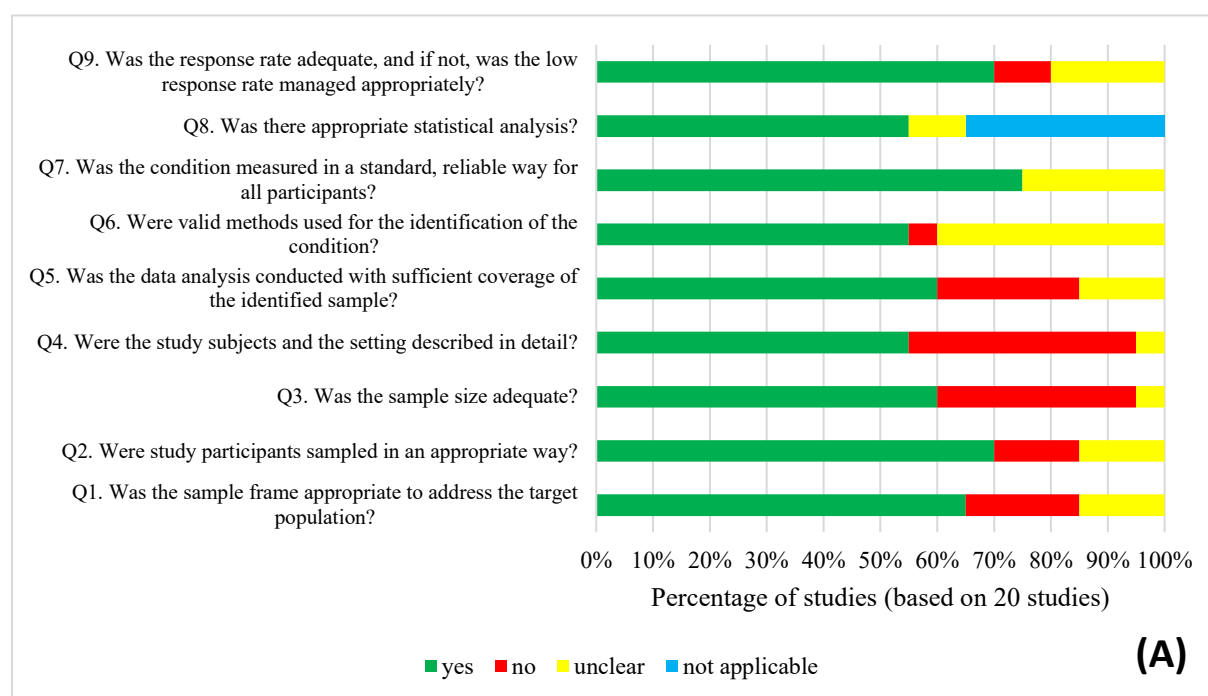

| References                    | Questions |    |    |    |    |    |    |    |    |
|-------------------------------|-----------|----|----|----|----|----|----|----|----|
|                               | Q1        | Q2 | Q3 | Q4 | Q5 | Q6 | Q7 | Q8 | Q9 |
| Boumesleh et al. 2021         |           |    |    |    |    |    |    |    |    |
| del Mar Bibiloni et al. 2018  |           |    |    |    |    |    |    |    |    |
| Escribano-Ott et al. 2022     |           |    |    |    |    |    |    |    |    |
| Eskici & Ersoy 2016           |           |    |    |    |    |    |    |    |    |
| Ferro et al. 2017             |           |    |    |    |    |    |    |    |    |
| Gacek & Wojtowicz 2021        |           |    |    |    |    |    |    |    |    |
| Gorrell et al. 2021           |           |    |    |    |    |    |    |    |    |
| Kampouri et al. 2019          |           |    |    |    |    |    |    |    |    |
| Mavra et al. 2014             |           |    |    |    |    |    |    |    |    |
| Michou & Costarelli 2011      |           |    |    |    |    |    |    |    |    |
| Monthuy-Blanc et al. 2012     |           |    |    |    |    |    |    |    |    |
| Musaiger & Ragheb 1994        |           |    |    |    |    |    |    |    |    |
| Nikić et al. 2014             |           |    |    |    |    |    |    |    |    |
| Nowak et al. 1988             |           |    |    |    |    |    |    |    |    |
| Sánchez-Díaz et al. 2021      |           |    |    |    |    |    |    |    |    |
| Schröder et al. 2004          |           |    |    |    |    |    |    |    |    |
| Szczepańska & Spalkowska 2012 |           |    |    |    |    |    |    |    |    |
| Toti et al. 2022              |           |    |    |    |    |    |    |    |    |
| Wells et al. 2015             |           |    |    |    |    |    |    |    |    |
| Zanders et al. 2021           |           |    |    |    |    |    |    |    |    |

Legend

yes no unclear not applicable

**(B)**

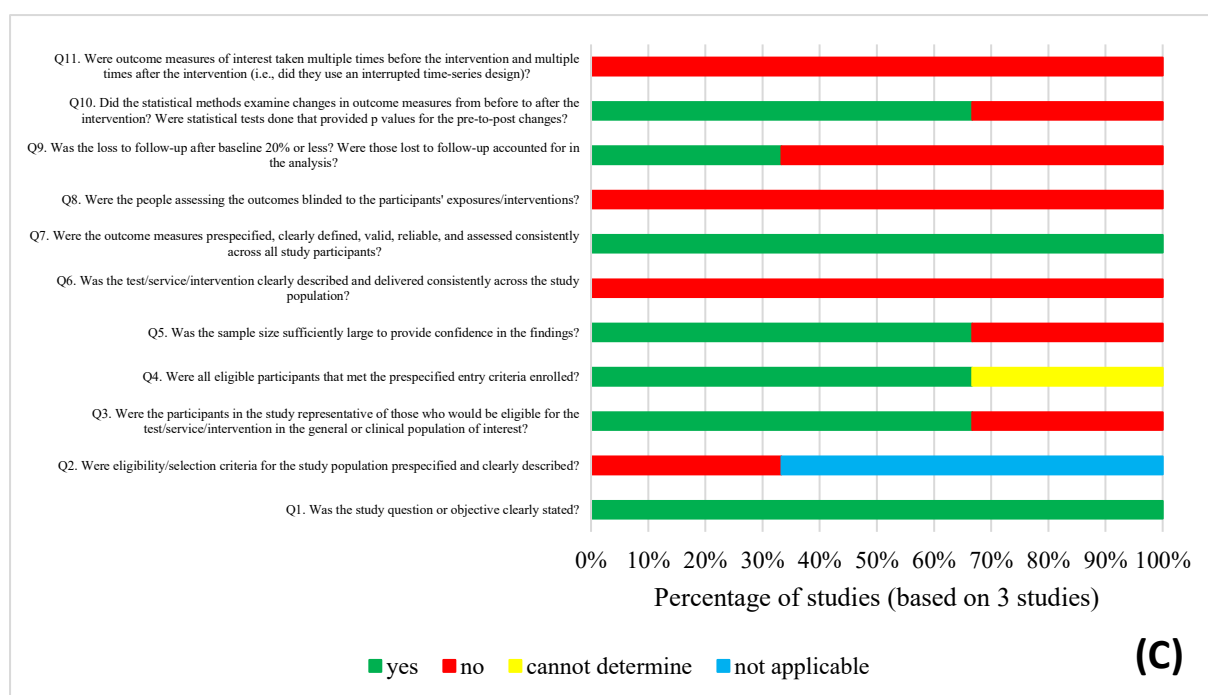

| References         | Questions |                |     |                  |     |    |     |    |     |     |     |
|--------------------|-----------|----------------|-----|------------------|-----|----|-----|----|-----|-----|-----|
|                    | Q1        | Q2             | Q3  | Q4               | Q5  | Q6 | Q7  | Q8 | Q9  | Q10 | Q11 |
| Grams et al. 2016  | yes       | not applicable | yes | yes              | yes | no | yes | no | no  | yes | no  |
| Toti et al. 2021   | yes       | not applicable | yes | yes              | yes | no | yes | no | no  | yes | no  |
| Tsoufi et al. 2017 | yes       | no             | no  | cannot determine | no  | no | yes | no | yes | no  | no  |

Legend

|     |    |                  |                |
|-----|----|------------------|----------------|
| yes | no | cannot determine | not applicable |
|-----|----|------------------|----------------|

(D)

| References            | Study design          | Randomisation process | Period and carryover effects | Deviations from the intended interventions | Missing outcome data | Measurement of the outcome | Selection of the reported result | Overall |
|-----------------------|-----------------------|-----------------------|------------------------------|--------------------------------------------|----------------------|----------------------------|----------------------------------|---------|
| Čabarkapa et al. 2020 | randomized cross-over | !                     | !                            | !                                          | +                    | !                          | !                                | !       |

Legend:

|          |               |           |
|----------|---------------|-----------|
| +        | !             | -         |
| Low risk | Some concerns | High risk |

(E)
