# Supplementary material for: Practical Application and Methodological Considerations on the Basics of Sports Nutrition in Basketball: A Comprehensive Systematic Review of Observational and Interventional Studies
Source: Nutrients. 2023 Oct 23;15(20):4484. doi: 10.3390/nu15204484 (PMC10610293; doi:10.3390/nu15204484)
Supplement: Supplementary file 1 [file nutrients-15-04484-s001.zip]

Archive with 6 entries (6 files):
- nutrients-2613531-supplementary/Supplementary material S3.pdf
- nutrients-2613531-supplementary/Supplementary material S4.pdf
- nutrients-2613531-supplementary/Supplementary material S5.pdf
- nutrients-2613531-supplementary/Supplementary material S6.pdf
- nutrients-2613531-supplementary/Supplementary table S1.pdf
- nutrients-2613531-supplementary/Supplementary table S2.pdf
